# Supplementary material for: Phospholipase D Toxins of Brown Spider Venom Convert Lysophosphatidylcholine and Sphingomyelin to Cyclic Phosphates
Source: PubMed Central journal article supplement (PMC3756997; doi:10.1371/journal.pone.0072372), 2013-08-29

**A**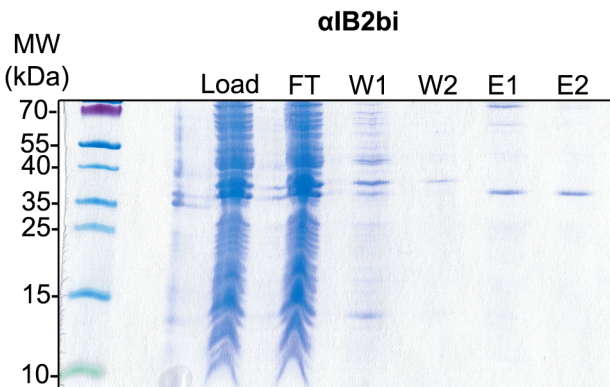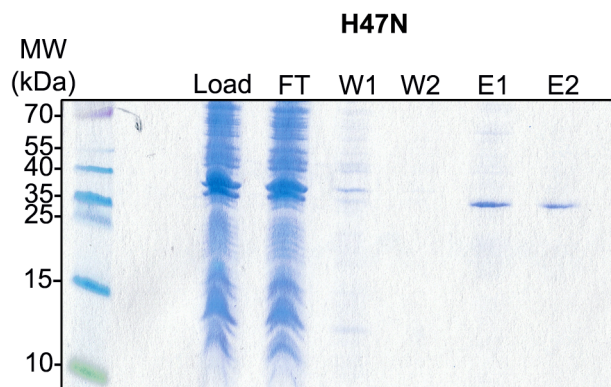**B**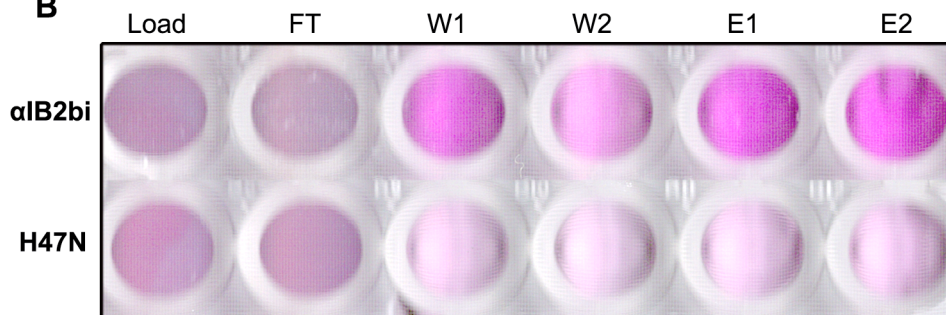**C**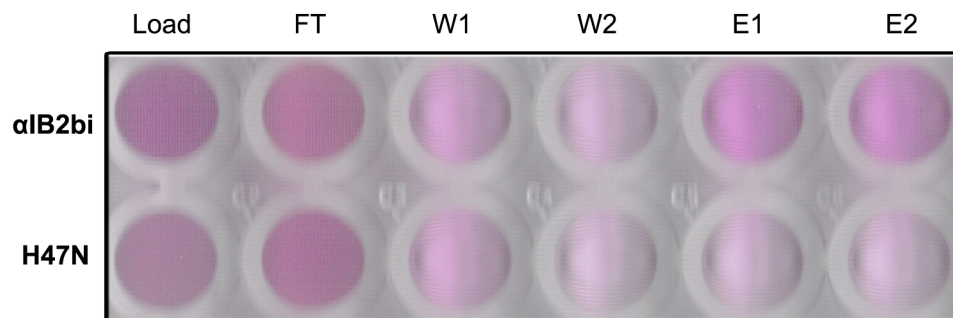

Supplement: pone.0072372.s001.pdf [file pone.0072372.s001.pdf]
